# Supplementary material for: PARAGEN 1.0: A Standardized Synthetic Gene Library for Fast Cell-Free Bacteriocin Synthesis
Source: Front Bioeng Biotechnol. 2019 Sep 6;7:213. doi: 10.3389/fbioe.2019.00213 (PMC6743375; doi:10.3389/fbioe.2019.00213)
Supplement: Supplementary file 1 [file Table_1.DOCX]

**SUPPLEMENTARY MATERIAL**

Bacteriocins synthesized *in vitro* for PARAGEN 1.0

| **Bacteriocin** | **Class** | **Size in AA** | **Spectrum of Activitya,b** | **Referencec** |
| --- | --- | --- | --- | --- |
| Acidocin A | IIa | 58 |  | [1] |
| Avicin A | 43 | LIS, EF, EFL | [2] |
| Bacteriocin 43 | 44 | LIS, EF, PP | [3] |
| Bacteriocin J46 | 27 |  | [4] |
| Carnobacteriocin BM1 | 44 | LIS, EF, EFL | [5] |
| Enterocin 35 | 44 | PP | [6] |
| Enterocin A | 47 | LIS, EF | [7] |
| Enterocin E50-52 | 39 | LAC | [8] |
| Enterocin E760 | 51 |  | [9] |
| Leucocin A | 37 | LIS, PP | [10] |
| Leucocin C | 43 | EF, EFL | [11] |
| Mundticin L | 43 | EF, EFL | [12] |
| Pediocin PA-1 | 44 | LIS, EFL, PP | [13] |
| Pediocin PA1 (1-7) / Enterocin E50-52 (10-39) | 37 |  | [14] |
| Piscicolin 126 | 44 | EF, EFL | [15] |
| Plantaricin 423 | 37 | LIS | [16] |
| Sakacin A | 41 | EF, EFL | [17] |
| Sakacin G | 38 |  | [18] |
| Sakacin P | 43 |  | [19] |
| Sakacin P (1-17) / Enterocin A (23-47) | 42 | PP | [20] |
| Sakacin P (1-17) / Pediocin PA1 (18-45) | 44 | PP | [20] |
| Sakacin X | 43 | EF, EFL | [21] |
| Ubericin A | 49 | LAC, LIS, EF, SP, PP | [22] |
| Abp118 (α+ß) | IIb | 45+46 | LAC, LIS, EF, SP, PP | [23] |
| Amylovorin L (α+ß) | 62+50 |  | [24] |
| Brochocin C (α+ß) | 59+43 | LIS, EF, SP, PP | [25] |
| Lactacin F (A+X) | 57+48 | LAC, SA, EF, EFL | [26] |
| Lactocin 705 (α+ß) | 33+33 |  | [27] |
| Lactococcin G (α+ß) | 39+35 | LAC, LIS, EF | [28] |
| Lactococcin Q (α+ß) | 39+35 | LAC, EF | [29] |
| Plantaricin EF (E+F) | 33+34 | LAC, SP | [30] |
| Plantaricin JK (J+K) | 25+32 |  | [30] |
| Plantaricin NC8 (α+ß) | 29+34 | EFL | [31] |
| Plantaricin S (α+ß) | 27+27 | LAC | [32] |
| Plantaricin W (α+ß) | 29+33 |  | [33] |
| Sakacin T (α+ß) | 51+43 | EF, EFL | [21] |
| **Bacteriocin** | **Class** | **Size in AA** | **Spectrum of Activitya,b** | **Referencec** |
| Thermophilin 13 (α+ß) | IIb | 62+43 | LAC, EF, SP | [34] |
| Thuricin CD (α+ß) | 30+30 |  | [35] |
| Aureocin A53 | IIc | 51 | LAC, SA, EF, EFL, PP | [36] |
| Aureocin A70 (A+B+C+D) | 31+30+31+31 | LAC, SA, LIS, SE, EFL | [37] |
| Cereucin H (A+B+C) | 26+30+30 | LAC | [38] |
| Cereucin V (A+B+C) | 30+30+31 | LAC, LIS | [38] |
| Cereucin X (A+B+C) | 27+29+30 | LAC, SA, EF, EFL | [38] |
| Enterocin 7 (A+B) | 44+43 | LAC, SA, LIS, EF, EFL | [39] |
| Enterocin L50 (A+B) | 44+43 | EC, LAC, SA, LIS, EF, SP, EFL, PP | [40] |
| Garvicin KS - (A+B+C) | 34+34+32 | LAC, SA, LIS, EF, SE, EFL | [38] |
| Lacticin Q | 53 | LAC, SA, LIS, EF, EFL | [41] |
| Lacticin Z | 53 | LAC, SA, LIS, EF, EFL | [42] |
| Lacticin Z - Variant 1 | 48 | LAC, LIS | WP_046945355.1 |
| Lacticin Z- Variant 2 | 48 | LAC, SA, EF, EFL | WP_078984773.1 |
| Mutacin BHT-B | 44 | LAC, EF, EFL | [43] |
| Weissellicin M | 43 | LAC, EF | [44] |
| Weissellicin Y | 43 | LAC | [44] |
| Acidocin 8912 | IId | 26 |  | [45] |
| Bacteriocin 32 | 70 | EF | [46] |
| Bacteriocin BlpK_ss | 52 | LAC, EF, EFL, PP | WP_013991125.1 |
| Bacteriocin UviB | 76 |  | [47] |
| Bactofencin A | 22 | SE | [48] |
| Cerein 7B | 56 | LAC | [49] |
| Colicin V (Microcin C) | 88 | EC | [50] |
| Enterocin EJ97 | 44 | SA, EF, EFL | [51] |
| Enterocin K1 | 38 | EF, EFL | [52] |
| Epidermicin Ni01 | 51 | LAC, EF, EFL | [53] |
| Garvieacin Q | 50 | LAC, EF, EFL | [54] |
| Gassericin T | 57 |  | [55] |
| Halocin C8 | 76 |  | [56] |
| Halocin S8 | 36 |  | [57] |
| Lactococcin 972 | 66 |  | [58] |
| Lactococcin A | 54 | LAC | [59] |
| Lactococcin B | 47 | LAC | [60] |
| Laterosporulin | 50 |  | [61] |
| Leucocin B | 31 |  | [11] |
| Leucocin K7 | 34 |  | [62] |
| LsbA | 44 | LAC | [63] |
| LsbB | 30 | LAC | [63] |
| **Bacteriocin** | **Class** | **Size in AA** | **Spectrum of Activitya,b** | **Referencec** |
| Microcin 24 | IId | 74 | LAC | [64] |
| Microcin B17 (1-41)/Colicin V (57-88) | 75 |  | [65] |
| Microcin E492 | 84 |  | [66] |
| Microcin H47 (1-51)/Colicin V (57-88) | 84 | EC | [65] |
| Microcin H47 (1-60)/Colicin V (57-88) | 94 | EC | [65] |
| Microcin L | 90 | EC | [67] |
| Microcin M | 77 |  | [68] |
| Plantaricin 1,25β | 53 |  | [69] |
| Plantaricin A | 23 |  | [70] |
| Plantaricin ASM1 | 44 |  | [71] |
| Plantaricin N | 30 |  | [72] |
| Plantaricin ZJ5 | 22 |  | [73] |
| Pneumocin BlpD | 36 |  | [74] |
| Pneumocin BlpK | 52 | LAC | [74] |
| Propionicin F | 43 |  | [75] |
| Propionicin T1 | 65 |  | [76] |
| Sakacin Q | 49 |  | [77] |
| Salivaricin V | 53 |  | WP_002884558.1 |
| Salivaricin W | 28 |  | AEJ52683.1 |
| Salivaricin X | 43 |  | ALR80677.1 |
| Salivaricin Y | 34 |  | WP_045771794.1 |
| Salivaricin Z | 33 |  | WP_002887002.1 |
| Subtilosin A | 43 |  | [78] |
| Subtilosin X | 50 |  | [79] |
| Thuricin 17 | 31 |  | [80] |
| Thuricin S | 18 |  | [81] |
| Warnericin RK | 22 |  | [82] |
| Weissellicin 110 | 31 | LAC | [83] |
| Albusin B | III | 290 |  | [84] |
| Alveicin A | 408 |  | [85] |
| Bacteriocin 28B | 449 | EC | [86] |
| Bacteriocin BCN 5 | 890 |  | [87] |
| Carocin D | 828 |  | [88] |
| Carocin D - Variant 2 | 480 |  | ACA70312.1 |
| Closticin 574 | 283 | LAC, EFL | [89] |
| Colicin B | 511 | EC | [90] |
| Colicin FY | 438 |  | [91] |
| Colicin K | 548 | EC | [92] |
| Colicin Y | 604 |  | [93] |
| Dysgalacticin | 193 |  | [94] |
| **Bacteriocin** | **Class** | **Size in AA** | **Spectrum of Activitya,b** | **Referencec** |
| Enterolysin A | III | 316 | EF, EFL | [95] |
| Halocin H4 | 313 |  | [96] |
| Ipomicin | 96 | LAC | [97] |
| Linocin M18 | 267 |  | [98] |
| Maritimacin | 255 |  | [99] |
| Microcin S | 102 |  | [100] |
| Pesticin | 358 |  | [101] |
| Propionicin SM1 | 180 |  | [102] |
| Putidacin L1 | 276 |  | [103] |
| Pyocin S2 | 690 |  | [104] |
| Salmocin E1A | 483 | BS, BC | [105] |
| Salmocin E1B | 527 | EC, BS, BC | [105] |
| Zoocin A | 263 |  | [106] |

aBacteriocins that did not show activity against the indicators tested have been left blank since they could be active against an indicator that has not yet been tested.

bStrains used in this study as activity indicators: BC, *Bacillus cereus* ATCC 14579; BS, *B. subtilis* 168; EC, *Escherichia coli* DH10B; EFL, *Enterococcus faecalis* Si0159; EF, *E. faecium* ATCC 19434; LAC, *Lactococcus lactis* IL1403; LIS, *Listeria monocytogenes* ATCC 19115; PP, *Pediococcus pentosaceus* HELA; SA, *Staphylococcus aureus aureus* ATCC 6538; SE, *S. epirdermis* ATCC 12228; SM, *Streptococcus mutans* UA159; SP, *S. pyogenes* ATCC 12344.

cWhen a bacteriocin has not been published, the NCBI reference sequence or GenBank number is provided instead.

REFERENCES

1. Kanatani, K., M. Oshimura, and K. Sano, *Isolation and characterization of acidocin A and cloning of the bacteriocin gene from Lactobacillus acidophilus.* Appl Environ Microbiol, 1995. **61**(3): p. 1061-7.

2. Birri, D.J., et al., *Molecular and genetic characterization of a novel bacteriocin locus in Enterococcus avium isolates from infants.* Appl Environ Microbiol, 2010. **76**(2): p. 483-92.

3. Todokoro, D., et al., *Genetic analysis of bacteriocin 43 of vancomycin-resistant Enterococcus faecium.* Appl Environ Microbiol, 2006. **72**(11): p. 6955-64.

4. Huot, E., et al., *Bacteriocin J46, a New Bacteriocin Produced byLactococcus lactisSubsp.cremorisJ46: Isolation and Characterization of the Protein and Its Gene.* Anaerobe, 1996. **2**(3): p. 137-145.

5. Quadri, L.E., et al., *Chemical and genetic characterization of bacteriocins produced by Carnobacterium piscicola LV17B.* J Biol Chem, 1994. **269**(16): p. 12204-11.

6. Farias, M.E., et al., *Purification and N-terminal amino acid sequence of Enterocin CRL 35, a 'pediocin-like' bacteriocin produced by Enterococcus faecium CRL 35.* Lett Appl Microbiol, 1996. **22**(6): p. 417-9.

7. Aymerich, T., et al., *Biochemical and genetic characterization of enterocin A from Enterococcus faecium, a new antilisterial bacteriocin in the pediocin family of bacteriocins.* Appl Environ Microbiol, 1996. **62**(5): p. 1676-82.

8. Svetoch, E.A., et al., *Diverse antimicrobial killing by Enterococcus faecium E 50-52 bacteriocin.* J Agric Food Chem, 2008. **56**(6): p. 1942-8.

9. Line, J.E., et al., *Isolation and purification of enterocin E-760 with broad antimicrobial activity against gram-positive and gram-negative bacteria.* Antimicrob Agents Chemother, 2008. **52**(3): p. 1094-100.

10. Hastings, J.W., et al., *Characterization of leucocin A-UAL 187 and cloning of the bacteriocin gene from Leuconostoc gelidum.* J Bacteriol, 1991. **173**(23): p. 7491-500.

11. Papathanasopoulos, M.A., et al., *Sequence and structural relationships of leucocins A-, B- and C-TA33a from Leuconostoc mesenteroides TA33a.* Microbiology, 1998. **144 ( Pt 5)**: p. 1343-8.

12. Feng, G., et al., *Characterization of mundticin L, a class IIa anti-Listeria bacteriocin from Enterococcus mundtii CUGF08.* Appl Environ Microbiol, 2009. **75**(17): p. 5708-13.

13. Nieto Lozano, J.C., et al., *Purification and amino acid sequence of a bacteriocin produced by Pediococcus acidilactici.* J Gen Microbiol, 1992. **138**(9): p. 1985-90.

14. Tiwari, S.K., et al., *Improved antimicrobial activities of synthetic-hybrid bacteriocins designed from enterocin E50-52 and pediocin PA-1.* Appl Environ Microbiol, 2015. **81**(5): p. 1661-7.

15. Jack, R.W., et al., *Characterization of the chemical and antimicrobial properties of piscicolin 126, a bacteriocin produced by Carnobacterium piscicola JG126.* Appl Environ Microbiol, 1996. **62**(8): p. 2897-903.

16. Van Reenen, C.A., et al., *Characterization and heterologous expression of a class IIa bacteriocin, plantaricin 423 from Lactobacillus plantarum 423, in Saccharomyces cerevisiae.* Int J Food Microbiol, 2003. **81**(1): p. 29-40.

17. Holck, A., et al., *Purification and amino acid sequence of sakacin A, a bacteriocin from Lactobacillus sake Lb706.* J Gen Microbiol, 1992. **138**(12): p. 2715-20.

18. Simon, L., et al., *Sakacin g, a new type of antilisterial bacteriocin.* Appl Environ Microbiol, 2002. **68**(12): p. 6416-20.

19. Tichaczek, P.S., R.F. Vogel, and W.P. Hammes, *Cloning and sequencing of sakP encoding sakacin P, the bacteriocin produced by Lactobacillus sake LTH 673.* Microbiology, 1994. **140 ( Pt 2)**: p. 361-7.

20. Johnsen, L., G. Fimland, and J. Nissen-Meyer, *The C-terminal domain of pediocin-like antimicrobial peptides (class IIa bacteriocins) is involved in specific recognition of the C-terminal part of cognate immunity proteins and in determining the antimicrobial spectrum.* J Biol Chem, 2005. **280**(10): p. 9243-50.

21. Vaughan, A., V.G. Eijsink, and D. Van Sinderen, *Functional characterization of a composite bacteriocin locus from malt isolate Lactobacillus sakei 5.* Appl Environ Microbiol, 2003. **69**(12): p. 7194-203.

22. Heng, N.C., et al., *Ubericin A, a class IIa bacteriocin produced by Streptococcus uberis.* Appl Environ Microbiol, 2007. **73**(23): p. 7763-6.

23. Flynn, S., et al., *Characterization of the genetic locus responsible for the production of ABP-118, a novel bacteriocin produced by the probiotic bacterium Lactobacillus salivarius subsp. salivarius UCC118.* Microbiology, 2002. **148**(Pt 4): p. 973-84.

24. Contreras, B.G., et al., *Isolation, purification, and amino acid sequence of lactobin A, one of the two bacteriocins produced by Lactobacillus amylovorus LMG P-13139.* Appl Environ Microbiol, 1997. **63**(1): p. 13-20.

25. McCormick, J.K., et al., *Genetic characterization and heterologous expression of brochocin-C, an antibotulinal, two-peptide bacteriocin produced by Brochothrix campestris ATCC 43754.* Appl Environ Microbiol, 1998. **64**(12): p. 4757-66.

26. Fremaux, C., C. Ahn, and T.R. Klaenhammer, *Molecular analysis of the lactacin F operon.* Appl Environ Microbiol, 1993. **59**(11): p. 3906-15.

27. Cuozzo, S.A., et al., *Identification and nucleotide sequence of genes involved in the synthesis of lactocin 705, a two-peptide bacteriocin from Lactobacillus casei CRL 705.* FEMS Microbiol Lett, 2000. **185**(2): p. 157-61.

28. Moll, G., et al., *Lactococcin G is a potassium ion-conducting, two-component bacteriocin.* J Bacteriol, 1996. **178**(3): p. 600-5.

29. Zendo, T., et al., *Lactococcin Q, a novel two-peptide bacteriocin produced by Lactococcus lactis QU 4.* Appl Environ Microbiol, 2006. **72**(5): p. 3383-9.

30. Diep, D.B., L.S. Havarstein, and I.F. Nes, *A bacteriocin-like peptide induces bacteriocin synthesis in Lactobacillus plantarum C11.* Mol Microbiol, 1995. **18**(4): p. 631-9.

31. Maldonado, A., J.L. Ruiz-Barba, and R. Jimenez-Diaz, *Purification and genetic characterization of plantaricin NC8, a novel coculture-inducible two-peptide bacteriocin from Lactobacillus plantarum NC8.* Appl Environ Microbiol, 2003. **69**(1): p. 383-9.

32. Jimenez-Diaz, R., et al., *Purification and partial amino acid sequence of plantaricin S, a bacteriocin produced by Lactobacillus plantarum LPCO10, the activity of which depends on the complementary action of two peptides.* Appl Environ Microbiol, 1995. **61**(12): p. 4459-63.

33. Holo, H., et al., *Plantaricin W from Lactobacillus plantarum belongs to a new family of two-peptide lantibiotics.* Microbiology, 2001. **147**(Pt 3): p. 643-51.

34. Marciset, O., et al., *Thermophilin 13, a nontypical antilisterial poration complex bacteriocin, that functions without a receptor.* J Biol Chem, 1997. **272**(22): p. 14277-84.

35. Rea, M.C., et al., *Thuricin CD, a posttranslationally modified bacteriocin with a narrow spectrum of activity against Clostridium difficile.* Proc Natl Acad Sci U S A, 2010. **107**(20): p. 9352-7.

36. Netz, D.J., C. Bastos Mdo, and H.G. Sahl, *Mode of action of the antimicrobial peptide aureocin A53 from Staphylococcus aureus.* Appl Environ Microbiol, 2002. **68**(11): p. 5274-80.

37. Netz, D.J., et al., *Molecular characterisation of aureocin A70, a multi-peptide bacteriocin isolated from Staphylococcus aureus.* J Mol Biol, 2001. **311**(5): p. 939-49.

38. Ovchinnikov, K.V., et al., *Novel Group of Leaderless Multipeptide Bacteriocins from Gram-Positive Bacteria.* Appl Environ Microbiol, 2016. **82**(17): p. 5216-24.

39. Liu, X., et al., *Identification of an N-terminal formylated, two-peptide bacteriocin from Enterococcus faecalis 710C.* J Agric Food Chem, 2011. **59**(10): p. 5602-8.

40. Cintas, L.M., et al., *Enterocins L50A and L50B, two novel bacteriocins from Enterococcus faecium L50, are related to staphylococcal hemolysins.* J Bacteriol, 1998. **180**(8): p. 1988-94.

41. Fujita, K., et al., *Structural analysis and characterization of lacticin Q, a novel bacteriocin belonging to a new family of unmodified bacteriocins of gram-positive bacteria.* Appl Environ Microbiol, 2007. **73**(9): p. 2871-7.

42. Iwatani, S., et al., *Characterization and structure analysis of a novel bacteriocin, lacticin Z, produced by Lactococcus lactis QU 14.* Biosci Biotechnol Biochem, 2007. **71**(8): p. 1984-92.

43. Hyink, O., M. Balakrishnan, and J.R. Tagg, *Streptococcus rattus strain BHT produces both a class I two-component lantibiotic and a class II bacteriocin.* FEMS Microbiol Lett, 2005. **252**(2): p. 235-41.

44. Masuda, Y., et al., *Characterization and identification of weissellicin Y and weissellicin M, novel bacteriocins produced by Weissella hellenica QU 13.* J Appl Microbiol, 2012. **112**(1): p. 99-108.

45. Kanatani, K., et al., *Cloning and nucleotide sequence of the gene for acidocin 8912, a bacteriocin from Lactobacillus acidophilus TK8912.* Lett Appl Microbiol, 1995. **21**(6): p. 384-6.

46. Inoue, T., H. Tomita, and Y. Ike, *Bac 32, a novel bacteriocin widely disseminated among clinical isolates of Enterococcus faecium.* Antimicrob Agents Chemother, 2006. **50**(4): p. 1202-12.

47. Garnier, T. and S.T. Cole, *Complete nucleotide sequence and genetic organization of the bacteriocinogenic plasmid, pIP404, from Clostridium perfringens.* Plasmid, 1988. **19**(2): p. 134-50.

48. O'Shea, E.F., et al., *Bactofencin A, a new type of cationic bacteriocin with unusual immunity.* MBio, 2013. **4**(6): p. e00498-13.

49. Oscáriz, J.C., et al., *Purification and sequencing of cerein 7B, a novel bacteriocin produced by Bacillus cereus Bc7.* FEMS Microbiology Letters, 2006. **254**(1): p. 108-115.

50. Gratia, A., *Sur un remarquable exemple d'antagonisme entre deux souches de colibacille.* C R Soc Biol, 1925. **93**: p. 1040–1042.

51. Galvez, A., et al., *Isolation and characterization of enterocin EJ97, a bacteriocin produced by Enterococcus faecalis EJ97.* Arch Microbiol, 1998. **171**(1): p. 59-65.

52. Ovchinnikov, K.V., et al., *The Leaderless Bacteriocin Enterocin K1 Is Highly Potent against Enterococcus faecium: A Study on Structure, Target Spectrum and Receptor.* Front Microbiol, 2017. **8**: p. 774.

53. Sandiford, S. and M. Upton, *Identification, characterization, and recombinant expression of epidermicin NI01, a novel unmodified bacteriocin produced by Staphylococcus epidermidis that displays potent activity against Staphylococci.* Antimicrob Agents Chemother, 2012. **56**(3): p. 1539-47.

54. Tosukhowong, A., et al., *Garvieacin Q, a novel class II bacteriocin from Lactococcus garvieae BCC 43578.* Appl Environ Microbiol, 2012. **78**(5): p. 1619-23.

55. Kawai, Y., et al., *Primary amino acid and DNA sequences of gassericin T, a lactacin F-family bacteriocin produced by Lactobacillus gasseri SBT2055.* Biosci Biotechnol Biochem, 2000. **64**(10): p. 2201-8.

56. Li, Y., et al., *Purification and biological characterization of halocin C8, a novel peptide antibiotic from Halobacterium strain AS7092.* Extremophiles, 2003. **7**(5): p. 401-7.

57. Price, L.B. and R.F. Shand, *Halocin S8: a 36-amino-acid microhalocin from the haloarchaeal strain S8a.* J Bacteriol, 2000. **182**(17): p. 4951-8.

58. Martinez, B., et al., *Synthesis of lactococcin 972, a bacteriocin produced by Lactococcus lactis IPLA 972, depends on the expression of a plasmid-encoded bicistronic operon.* Microbiology, 1999. **145 ( Pt 11)**: p. 3155-61.

59. Holo, H., O. Nilssen, and I.F. Nes, *Lactococcin A, a new bacteriocin from Lactococcus lactis subsp. cremoris: isolation and characterization of the protein and its gene.* J Bacteriol, 1991. **173**(12): p. 3879-87.

60. van Belkum, M.J., J. Kok, and G. Venema, *Cloning, sequencing, and expression in Escherichia coli of lcnB, a third bacteriocin determinant from the lactococcal bacteriocin plasmid p9B4-6.* Appl Environ Microbiol, 1992. **58**(2): p. 572-7.

61. Singh, P.K., et al., *Identification, purification and characterization of laterosporulin, a novel bacteriocin produced by Brevibacillus sp. strain GI-9.* PLoS One, 2012. **7**(3): p. e31498.

62. Shi, F., et al., *Mode of action of leucocin K7 produced by Leuconostoc mesenteroides K7 against Listeria monocytogenes and its potential in milk preservation.* Biotechnol Lett, 2016. **38**(9): p. 1551-7.

63. Gajic, O., et al., *Novel mechanism of bacteriocin secretion and immunity carried out by lactococcal multidrug resistance proteins.* J Biol Chem, 2003. **278**(36): p. 34291-8.

64. O'Brien, G.J. and H.K. Mahanty, *Colicin 24, a new plasmid-borne colicin from a uropathogenic strain of Escherichia coli.* Plasmid, 1994. **31**(3): p. 288-96.

65. Azpiroz, M.F. and M. Lavina, *Modular structure of microcin H47 and colicin V.* Antimicrob Agents Chemother, 2007. **51**(7): p. 2412-9.

66. de Lorenzo, V., *Isolation and characterization of microcin E492 from Klebsiella pneumoniae.* Arch Microbiol, 1984. **139**(1): p. 72-5.

67. Gaillard-Gendron, S., et al., *Isolation, purification and partial amino acid sequence of a highly hydrophobic new microcin named microcin L produced by Escherichia coli.* FEMS Microbiol Lett, 2000. **193**(1): p. 95-8.

68. Vassiliadis, G., et al., *Microcin M, an antibacterial peptide from the probiotic bacterium Escherichia coli Nissle 1917*, in *1st International Symposium Food, Veterinary and Medical Applications of Antimicrobial Peptides*. 2006: ENITIAA, Nantes, France.

69. Ehrmann, M.A., et al., *A gene cluster encoding plantaricin 1.25beta and other bacteriocin-like peptides in Lactobacillus plantarum TMW1.25.* Biochim Biophys Acta, 2000. **1490**(3): p. 355-61.

70. Nissen-Meyer, J., et al., *Purification and characterization of plantaricin A, a Lactobacillus plantarum bacteriocin whose activity depends on the action of two peptides.* J Gen Microbiol, 1993. **139**(9): p. 1973-8.

71. Hata, T., R. Tanaka, and S. Ohmomo, *Isolation and characterization of plantaricin ASM1: a new bacteriocin produced by Lactobacillus plantarum A-1.* Int J Food Microbiol, 2010. **137**(1): p. 94-9.

72. Diep, D.B., L.S. Havarstein, and I.F. Nes, *Characterization of the locus responsible for the bacteriocin production in Lactobacillus plantarum C11.* J Bacteriol, 1996. **178**(15): p. 4472-83.

73. Song, D.F., M.Y. Zhu, and Q. Gu, *Purification and characterization of Plantaricin ZJ5, a new bacteriocin produced by Lactobacillus plantarum ZJ5.* PLoS One, 2014. **9**(8): p. e105549.

74. Bogaardt, C., A.J. van Tonder, and A.B. Brueggemann, *Genomic analyses of pneumococci reveal a wide diversity of bacteriocins - including pneumocyclicin, a novel circular bacteriocin.* BMC Genomics, 2015. **16**: p. 554.

75. Brede, D.A., et al., *Molecular and genetic characterization of propionicin F, a bacteriocin from Propionibacterium freudenreichii.* Appl Environ Microbiol, 2004. **70**(12): p. 7303-10.

76. Faye, T., et al., *Biochemical and genetic characterization of propionicin T1, a new bacteriocin from Propionibacterium thoenii.* Appl Environ Microbiol, 2000. **66**(10): p. 4230-6.

77. Mathiesen, G., et al., *Characterization of a new bacteriocin operon in sakacin P-producing Lactobacillus sakei, showing strong translational coupling between the bacteriocin and immunity genes.* Appl Environ Microbiol, 2005. **71**(7): p. 3565-74.

78. Babasaki, K., et al., *Subtilosin A, a new antibiotic peptide produced by Bacillus subtilis 168: isolation, structural analysis, and biogenesis.* J Biochem, 1985. **98**(3): p. 585-603.

79. Zheng, G., R. Hehn, and P. Zuber, *Mutational analysis of the sbo-alb locus of Bacillus subtilis: identification of genes required for subtilosin production and immunity.* J Bacteriol, 2000. **182**(11): p. 3266-73.

80. Gray, E.J., et al., *A novel bacteriocin, thuricin 17, produced by plant growth promoting rhizobacteria strain Bacillus thuringiensis NEB17: isolation and classification.* J Appl Microbiol, 2006. **100**(3): p. 545-54.

81. Chehimi, S., et al., *Purification and partial amino acid sequence of thuricin S, a new anti-Listeria bacteriocin from Bacillus thuringiensis.* Can J Microbiol, 2007. **53**(2): p. 284-90.

82. Verdon, J., et al., *Characterization of anti-Legionella activity of warnericin RK and delta-lysin I from Staphylococcus warneri.* Peptides, 2008. **29**(6): p. 978-84.

83. Srionnual, S., et al., *Weissellicin 110, a newly discovered bacteriocin from Weissella cibaria 110, isolated from plaa-som, a fermented fish product from Thailand.* Appl Environ Microbiol, 2007. **73**(7): p. 2247-50.

84. Chen, J., D.M. Stevenson, and P.J. Weimer, *Albusin B, a Bacteriocin from the Ruminal Bacterium <em>Ruminococcus albus</em> 7 That Inhibits Growth of <em>Ruminococcus flavefaciens</em>.* 2004. **70**(5): p. 3167-3170.

85. Wertz, J.E. and M.A. Riley, *Chimeric nature of two plasmids of Hafnia alvei encoding the bacteriocins alveicins A and B.* J Bacteriol, 2004. **186**(6): p. 1598-605.

86. Guasch, J.F., et al., *Bacteriocin 28b, a chromosomally encoded bacteriocin produced by most Serratia marcescens biotypes.* Res Microbiol, 1995. **146**(6): p. 477-83.

87. Garnier, T. and S.T. Cole, *Characterization of a bacteriocinogenic plasmid from Clostridium perfringens and molecular genetic analysis of the bacteriocin-encoding gene.* J Bacteriol, 1986. **168**(3): p. 1189-96.

88. Roh, E., et al., *Characterization of a new bacteriocin, Carocin D, from Pectobacterium carotovorum subsp. carotovorum Pcc21.* Appl Environ Microbiol, 2010. **76**(22): p. 7541-9.

89. Kemperman, R., et al., *Identification and characterization of two novel clostridial bacteriocins, circularin A and closticin 574.* Appl Environ Microbiol, 2003. **69**(3): p. 1589-97.

90. Schramm, E., et al., *Nucleotide sequence of the colicin B activity gene cba: consensus pentapeptide among TonB-dependent colicins and receptors.* J Bacteriol, 1987. **169**(7): p. 3350-7.

91. Bosak, J., et al., *Novel colicin Fy of Yersinia frederiksenii inhibits pathogenic Yersinia strains via YiuR-mediated reception, TonB import, and cell membrane pore formation.* J Bacteriol, 2012. **194**(8): p. 1950-9.

92. Goebel, W.F., *The nature of the colicin K of Escherichia coli K235.* Proc Natl Acad Sci U S A, 1973. **70**(3): p. 854-8.

93. Riley, M.A., et al., *The newly characterized colicin Y provides evidence of positive selection in pore-former colicin diversification.* Microbiology, 2000. **146 ( Pt 7)**: p. 1671-7.

94. Heng, N.C., et al., *Dysgalacticin: a novel, plasmid-encoded antimicrobial protein (bacteriocin) produced by Streptococcus dysgalactiae subsp. equisimilis.* Microbiology, 2006. **152**(Pt 7): p. 1991-2001.

95. Nilsen, T., I.F. Nes, and H. Holo, *Enterolysin A, a cell wall-degrading bacteriocin from Enterococcus faecalis LMG 2333.* Appl Environ Microbiol, 2003. **69**(5): p. 2975-84.

96. Cheung, J., et al., *Isolation, sequence, and expression of the gene encoding halocin H4, a bacteriocin from the halophilic archaeon Haloferax mediterranei R4.* J Bacteriol, 1997. **179**(2): p. 548-51.

97. Wang, J., K.L. Schully, and G.S. Pettis, *Growth-regulated expression of a bacteriocin, produced by the sweet potato pathogen Streptomyces ipomoeae, that exhibits interstrain inhibition.* Appl Environ Microbiol, 2009. **75**(5): p. 1236-42.

98. Valdes-Stauber, N. and S. Scherer, *Nucleotide sequence and taxonomical distribution of the bacteriocin gene lin cloned from Brevibacterium linens M18.* Appl Environ Microbiol, 1996. **62**(4): p. 1283-6.

99. Hicks, P.M., et al., *Homomultimeric protease in the hyperthermophilic bacterium Thermotoga maritima has structural and amino acid sequence homology to bacteriocins in mesophilic bacteria.* FEBS Lett, 1998. **440**(3): p. 393-8.

100. Zschuttig, A., et al., *Identification and characterization of microcin S, a new antibacterial peptide produced by probiotic Escherichia coli G3/10.* PLoS One, 2012. **7**(3): p. e33351.

101. Patzer, S.I., et al., *Structural and mechanistic studies of pesticin, a bacterial homolog of phage lysozymes.* J Biol Chem, 2012. **287**(28): p. 23381-96.

102. Miescher, S., et al., *Propionicin SM1, a bacteriocin from Propionibacterium jensenii DF1: isolation and characterization of the protein and its gene.* Syst Appl Microbiol, 2000. **23**(2): p. 174-84.

103. Parret, A.H., et al., *Plant lectin-like bacteriocin from a rhizosphere-colonizing Pseudomonas isolate.* J Bacteriol, 2003. **185**(3): p. 897-908.

104. Sano, Y., et al., *Molecular structures and functions of pyocins S1 and S2 in Pseudomonas aeruginosa.* J Bacteriol, 1993. **175**(10): p. 2907-16.

105. Schneider, T., et al., *Plant-made Salmonella bacteriocins salmocins for control of Salmonella pathovars.* Sci Rep, 2018. **8**(1): p. 4078.

106. Simmonds, R.S., W.J. Simpson, and J.R. Tagg, *Cloning and sequence analysis of zooA, a Streptococcus zooepidemicus gene encoding a bacteriocin-like inhibitory substance having a domain structure similar to that of lysostaphin.* Gene, 1997. **189**(2): p. 255-61.
